# Supplementary material for: Combinational blockade of MET and PD-L1 improves pancreatic cancer immunotherapeutic efficacy
Source: Springer Nature journal article supplement (doi:10.1186/s13046-021-02055-w), 2021-09-03
Supplement: MOESM1 [file 19630890]

**A****MET**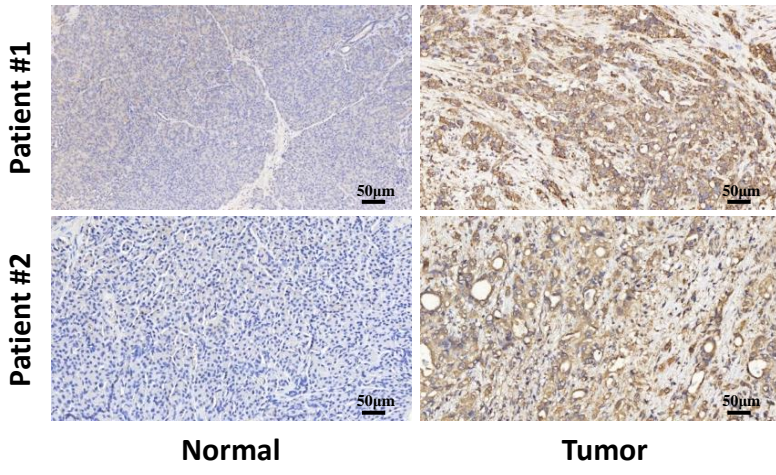**B**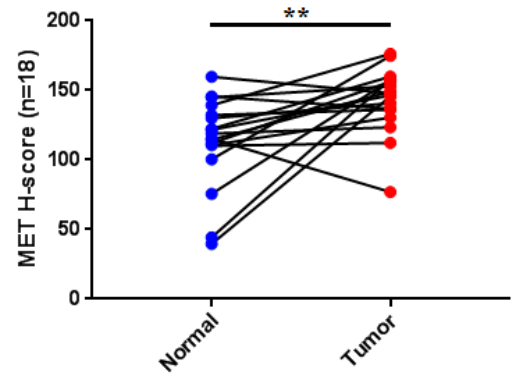

**A**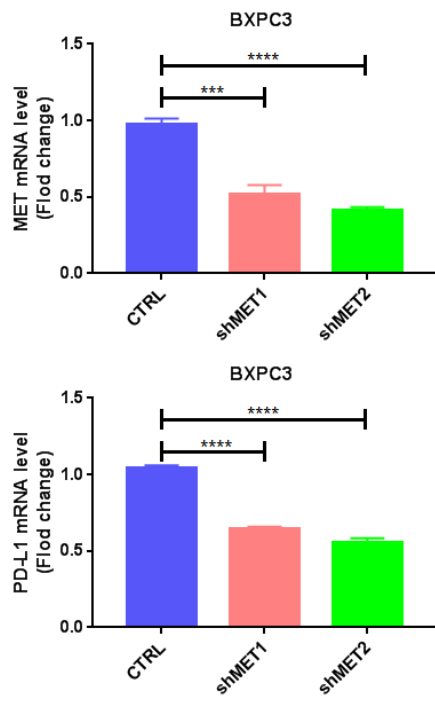**B**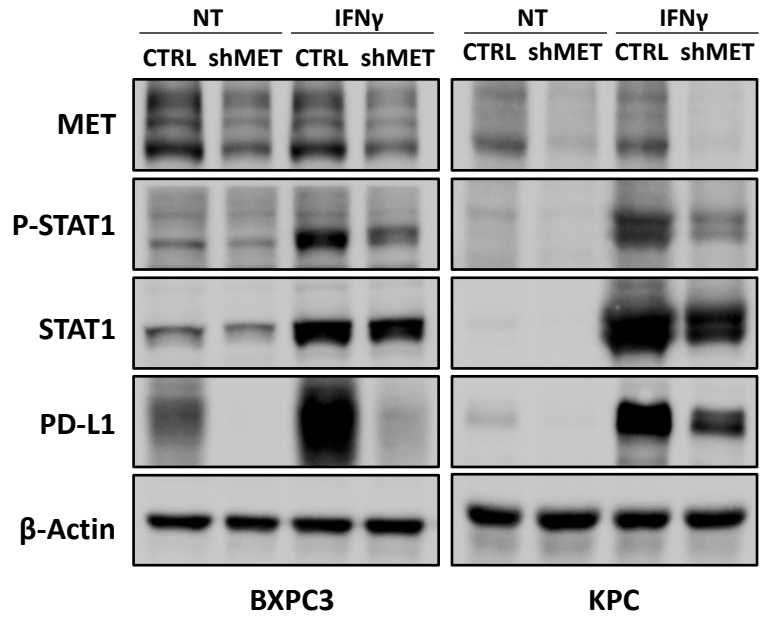

**A**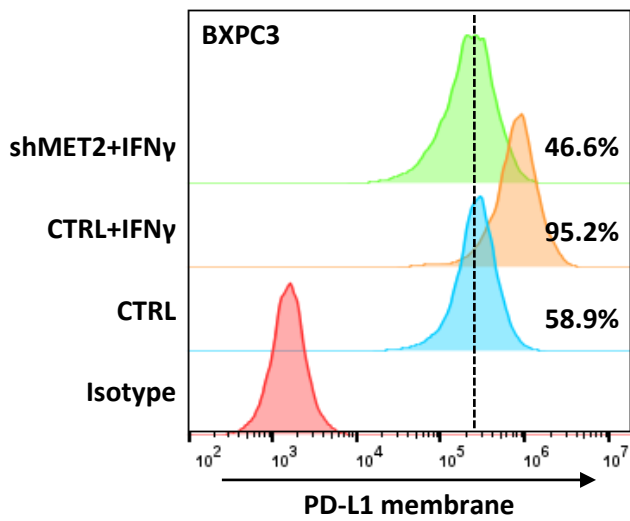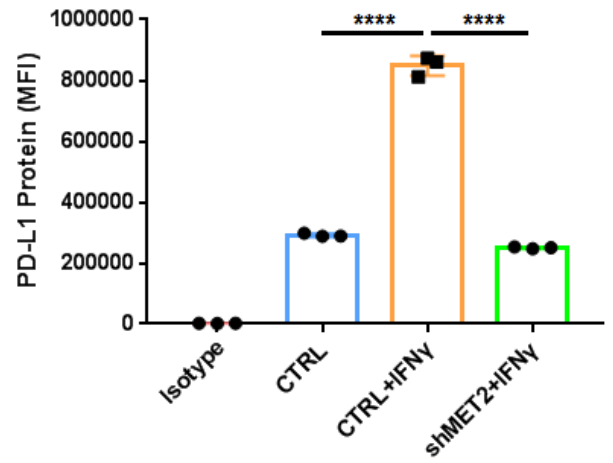**B**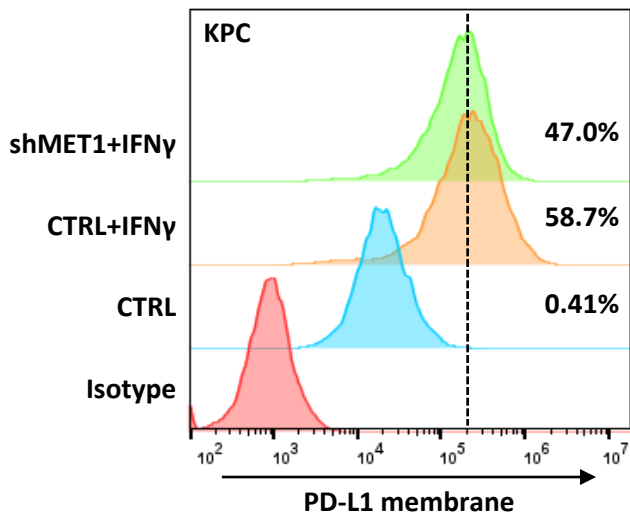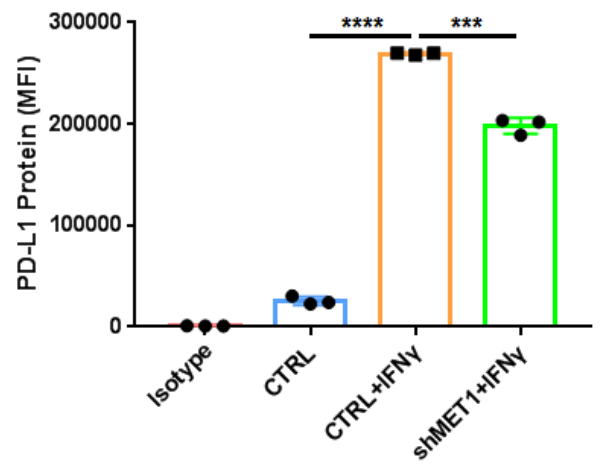**C**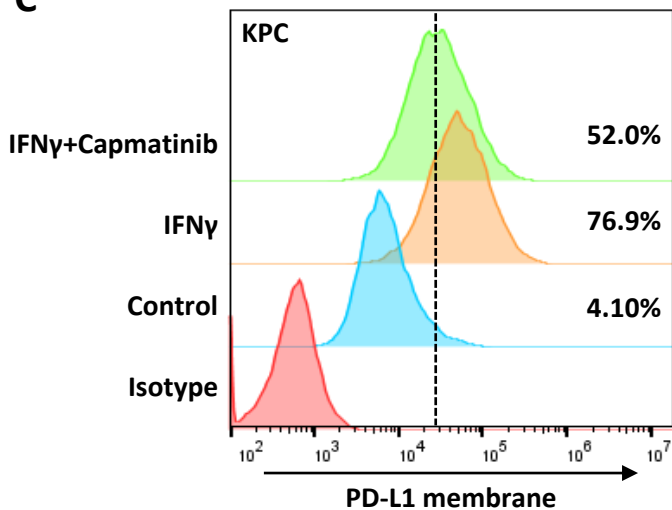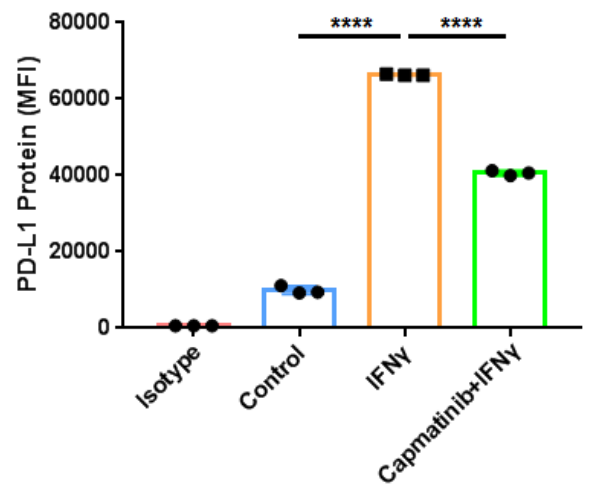

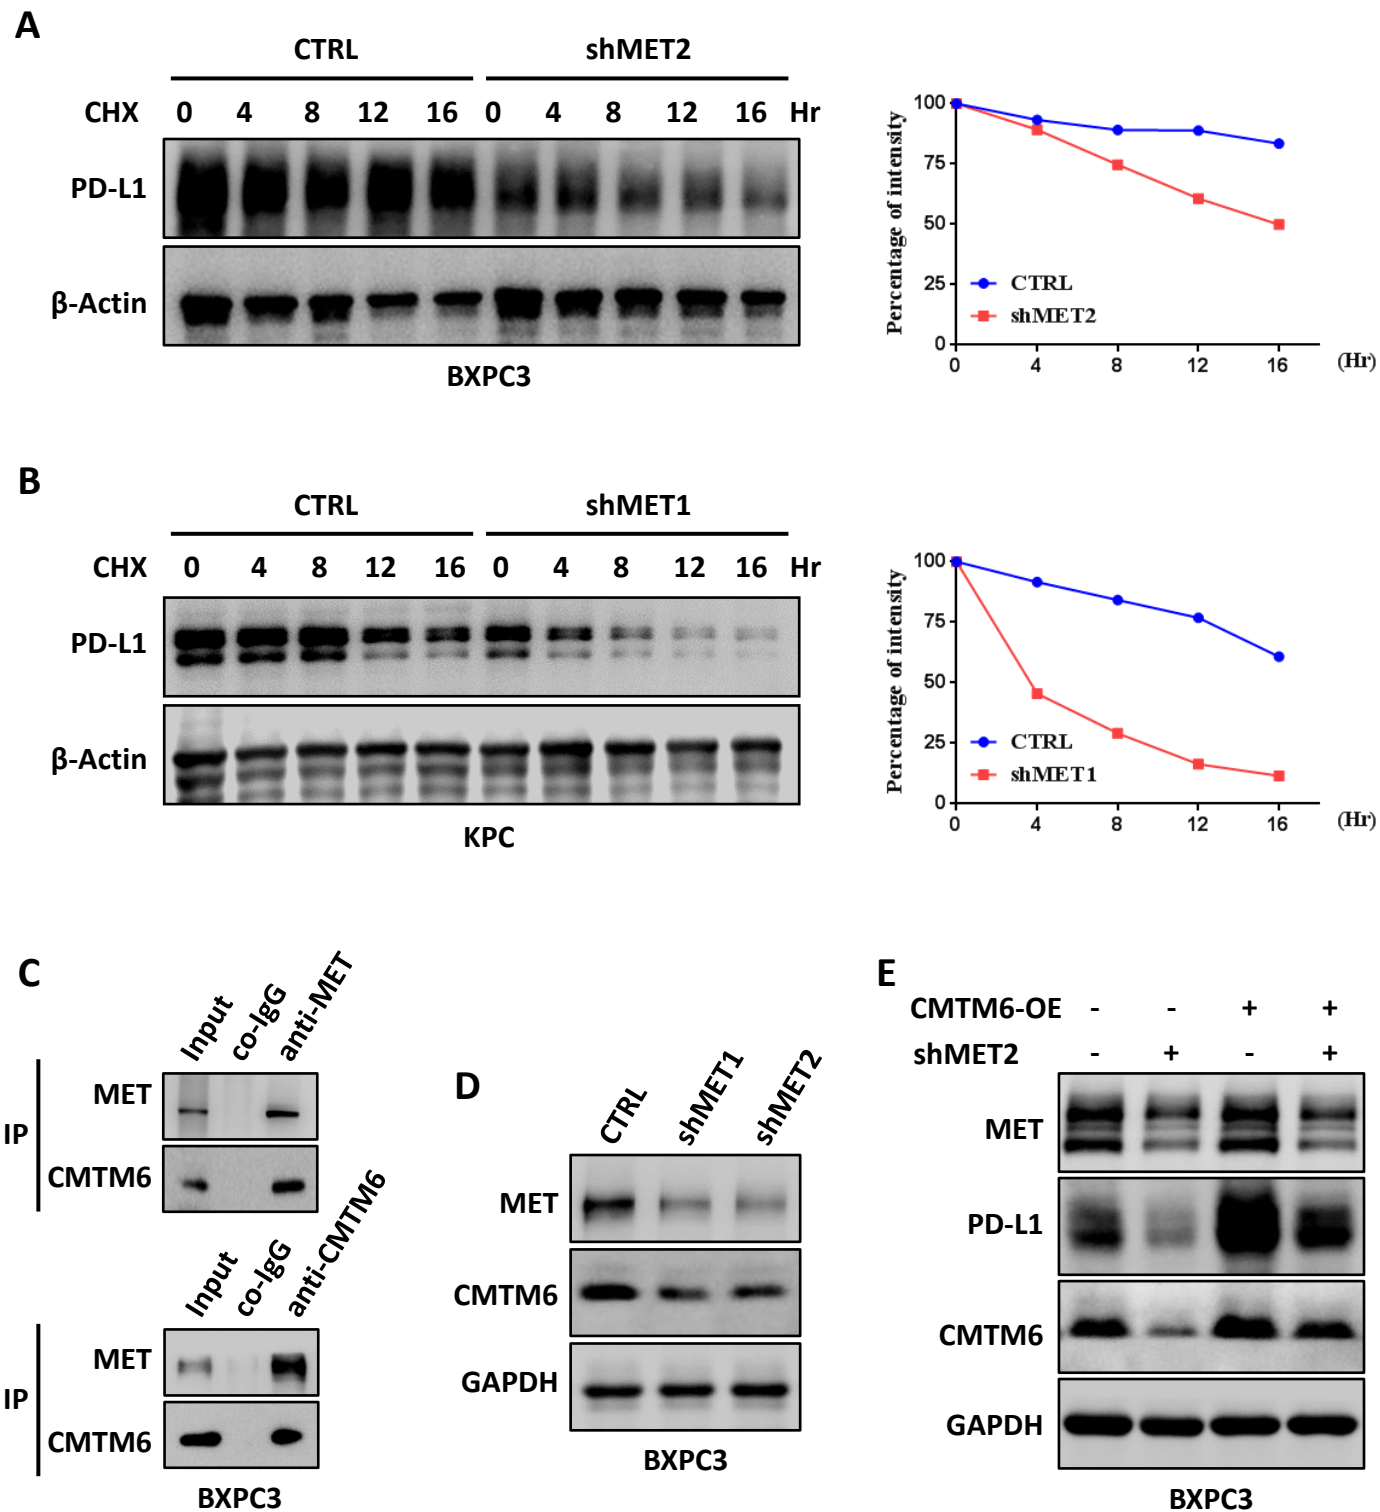

Figure S4

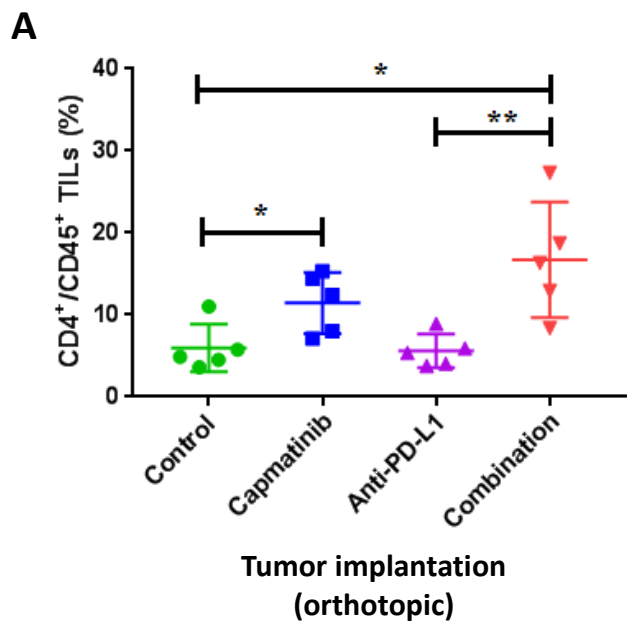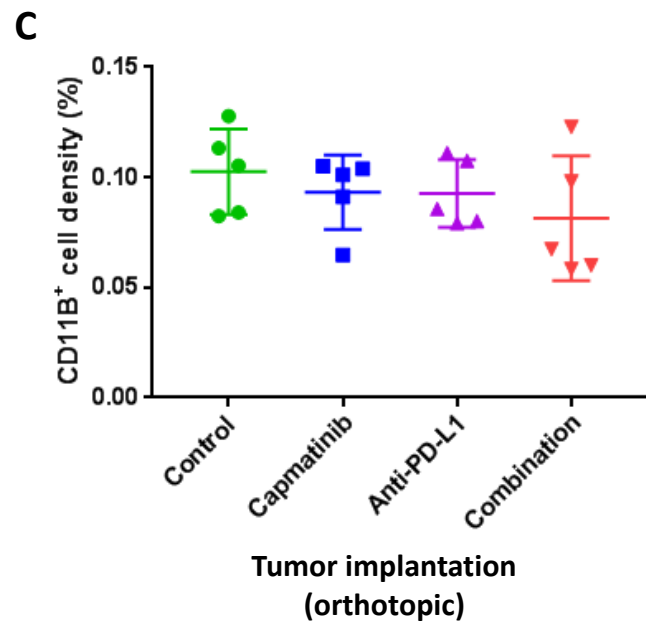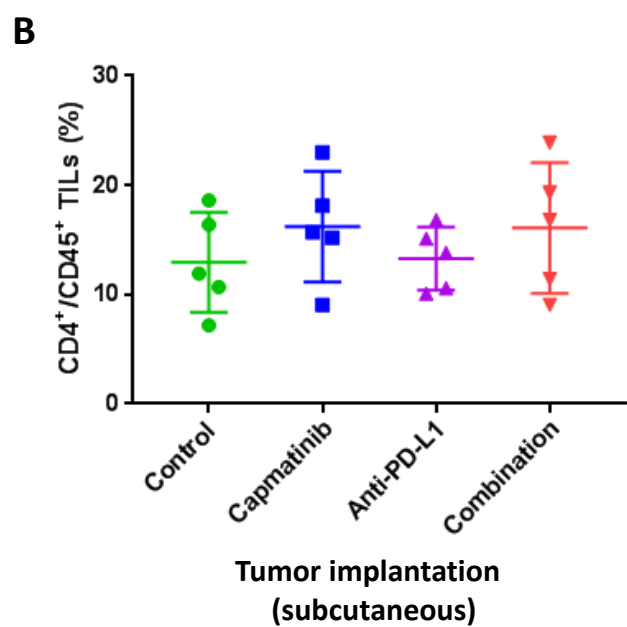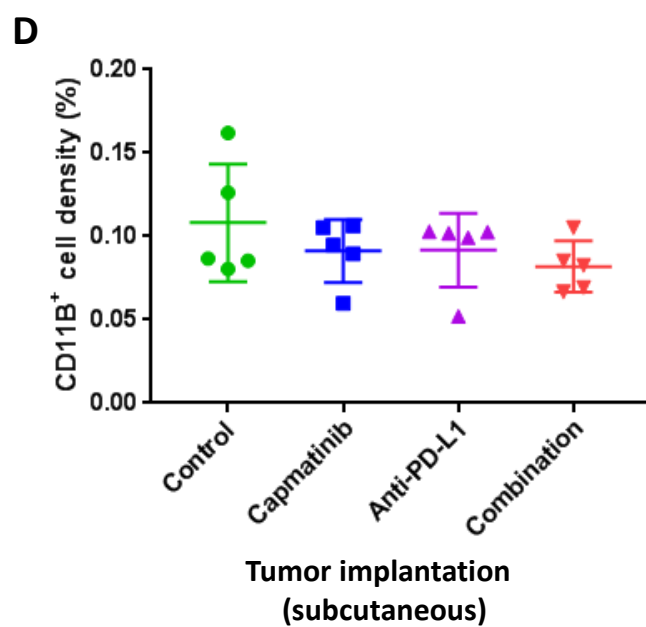

Figure S5

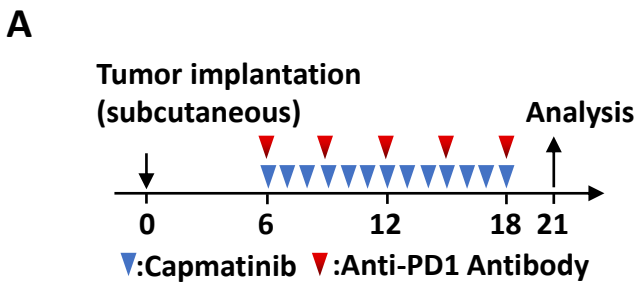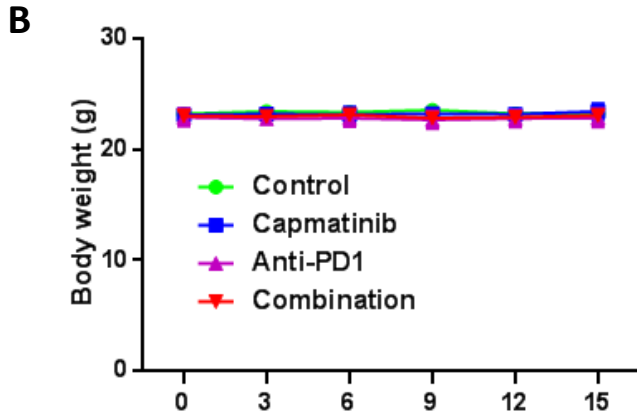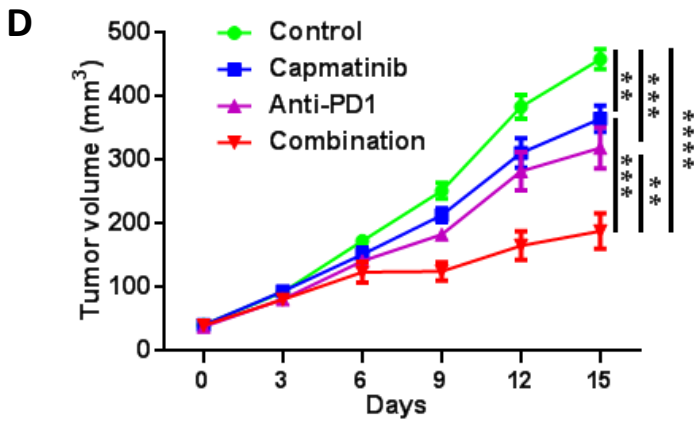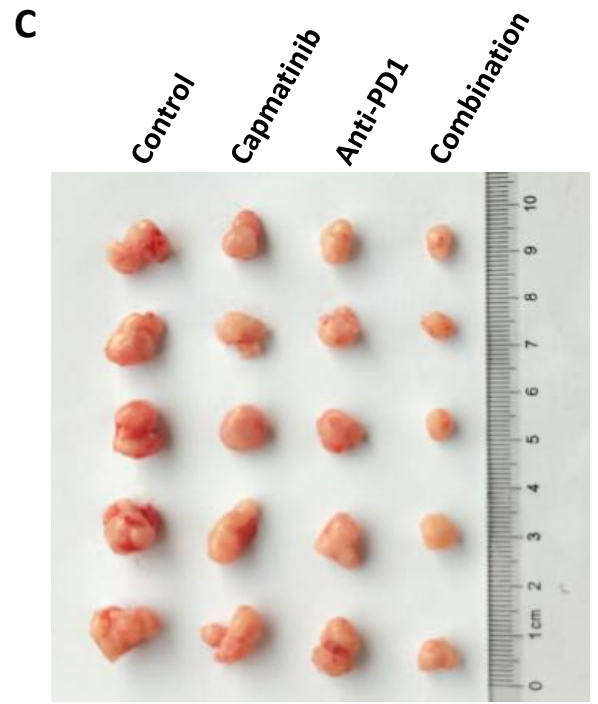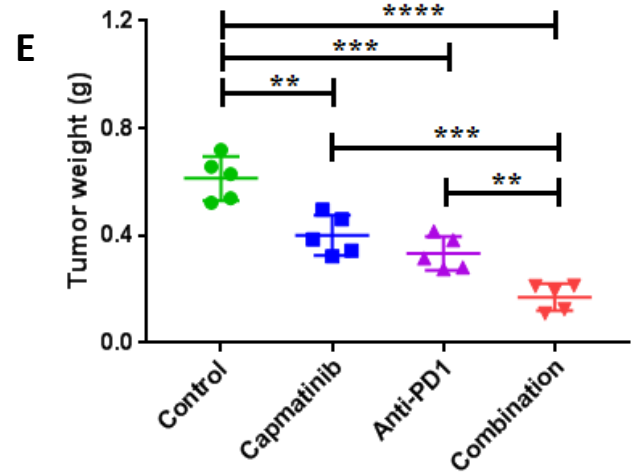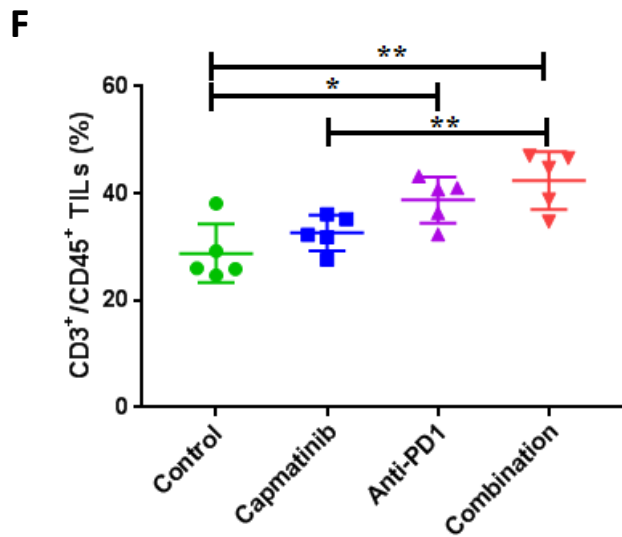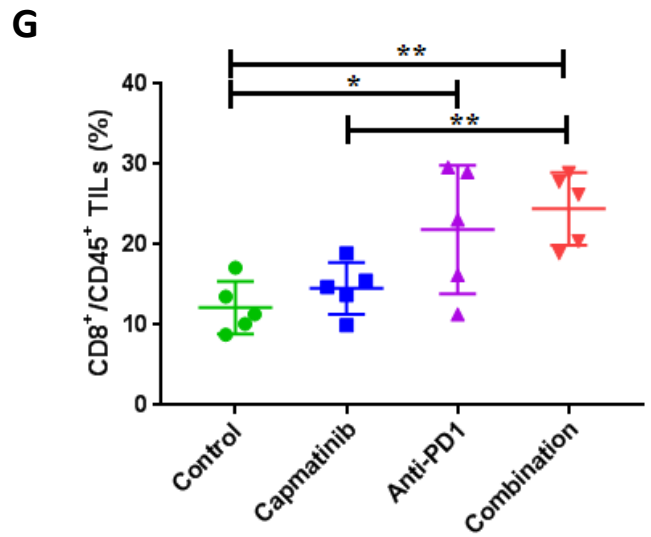

Figure S6
